# Supplementary material for: Parents face quantity–quality trade-offs between reproduction and investment in offspring in Iceland
Source: PubMed Central journal article supplement (PMC4892449; doi:10.1098/rsos.160087), 2016-05-18

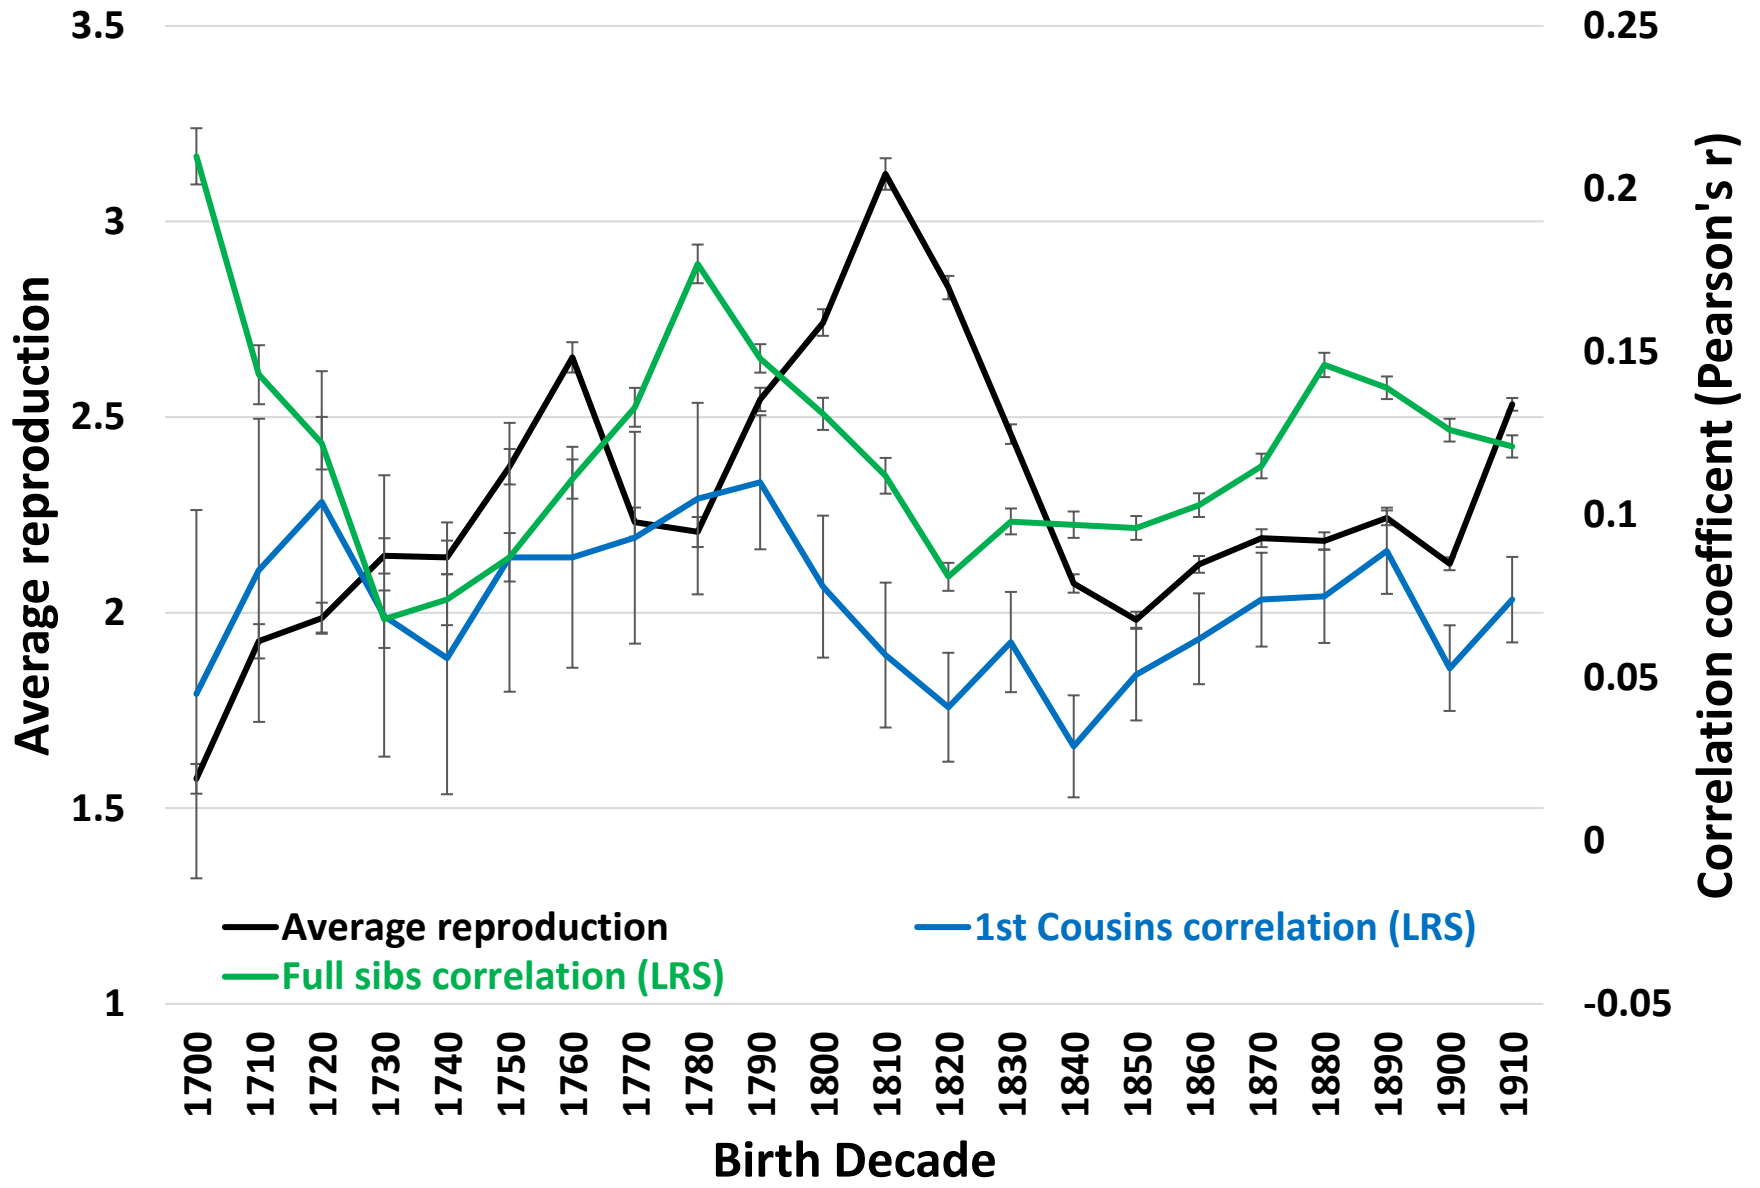

Supplement: rsos160087supp2.pdf [file rsos160087supp2.pdf]
