# Supplementary material for: Parents face quantity–quality trade-offs between reproduction and investment in offspring in Iceland
Source: PubMed Central journal article supplement (PMC4892449; doi:10.1098/rsos.160087), 2016-05-18
Supplement: rsos160087supp3.pdf [file rsos160087supp3.pdf]

| Birth decade | Full sibs correlation (LRS) | N     | S.E.     | Full sibs cc | N     | S.E.     | Parent off: |
|--------------|-----------------------------|-------|----------|--------------|-------|----------|-------------|
| 1700         | 0.21                        | 3286  | 8.62E-03 | 0.318        | 322   | 0.0256   | 0.121       |
| 1710         | 0.143                       | 2946  | 9.05E-03 | 0.17         | 644   | 0.0195   | -0.049      |
| 1720         | 0.122                       | 3785  | 8.06E-03 | 0.208        | 938   | 0.0159   | -0.023      |
| 1730         | 0.068                       | 3221  | 8.82E-03 | 0.177        | 1062  | 0.0152   | -0.081      |
| 1740         | 0.074                       | 4047  | 7.83E-03 | 0.288        | 1370  | 0.0126   | -0.104      |
| 1750         | 0.087                       | 4440  | 7.44E-03 | 0.247        | 1596  | 0.012    | -0.123      |
| 1760         | 0.111                       | 6717  | 6.02E-03 | 0.232        | 2585  | 9.50E-03 | -0.128      |
| 1770         | 0.133                       | 6886  | 5.97E-03 | 0.22         | 2551  | 9.61E-03 | -0.084      |
| 1780         | 0.177                       | 7061  | 5.93E-03 | 0.139        | 2486  | 0.01     | -0.018      |
| 1790         | 0.148                       | 13229 | 4.37E-03 | 0.149        | 4515  | 7.43E-03 | -7.00E-03   |
| 1800         | 0.131                       | 10323 | 4.93E-03 | 0.152        | 3746  | 8.14E-03 | -0.073      |
| 1810         | 0.112                       | 8424  | 5.49E-03 | 0.129        | 3370  | 8.64E-03 | -0.068      |
| 1820         | 0.081                       | 13762 | 4.29E-03 | 0.1          | 5194  | 7.01E-03 | -0.107      |
| 1830         | 0.098                       | 15982 | 3.98E-03 | 0.118        | 5882  | 6.56E-03 | -0.091      |
| 1840         | 0.097                       | 15527 | 4.05E-03 | 0.134        | 5858  | 6.55E-03 | -0.096      |
| 1850         | 0.096                       | 19124 | 3.64E-03 | 0.142        | 8028  | 5.58E-03 | -0.081      |
| 1860         | 0.103                       | 19137 | 3.64E-03 | 0.129        | 8711  | 5.38E-03 | -0.073      |
| 1870         | 0.115                       | 17587 | 3.78E-03 | 0.136        | 9430  | 5.16E-03 | -0.039      |
| 1880         | 0.146                       | 17892 | 3.74E-03 | 0.108        | 10684 | 4.88E-03 | 4.00E-03    |
| 1890         | 0.139                       | 20999 | 3.47E-03 | 0.089        | 14815 | 4.16E-03 | 0.033       |
| 1900         | 0.126                       | 20886 | 3.50E-03 | 0.065        | 16344 | 3.97E-03 | 0.021       |
| 1910         | 0.121                       | 21932 | 3.41E-03 | 0.06         | 14909 | 4.16E-03 | 4.00E-03    |

| <b>N</b> | <b>S.E.</b> | <b>Parent off: N</b> | <b>S.E.</b> | <b>1st Cousin: N</b> | <b>S.E.</b> | <b>Average re</b>     |
|----------|-------------|----------------------|-------------|----------------------|-------------|-----------------------|
| 1390     | 0.0135      | 0.131                | 70          | 0.0638               | 0.045       | 1200 0.056489 1.5753  |
| 789      | 0.0181      | 0.107                | 102         | 0.0361               | 0.083       | 1753 0.046504 1.9269  |
| 1058     | 0.0157      | 0.098                | 115         | 0.0472               | 0.104       | 2340 0.040088 1.9859  |
| 892      | 0.0169      | 0.072                | 170         | 0.0389               | 0.069       | 2044 0.043157 2.1452  |
| 1248     | 0.0144      | 0.101                | 210         | 0.0351               | 0.056       | 2197 0.041694 2.1412  |
| 1362     | 0.0136      | 0.057                | 329         | 0.0279               | 0.087       | 2226 0.041237 2.3732  |
| 2035     | 0.0112      | 0.063                | 397         | 0.0256               | 0.087       | 3296 0.033887 2.6527  |
| 2051     | 0.0112      | 0.055                | 655         | 0.0199               | 0.093       | 3577 0.032493 2.2316  |
| 1790     | 0.0121      | 0.099                | 690         | 0.0194               | 0.105       | 4355 0.029376 2.2062  |
| 3056     | 9.23E-03    | 0.073                | 641         | 0.02                 | 0.11        | 8872 0.020558 2.5451  |
| 2308     | 0.0105      | 0.077                | 1063        | 0.0156               | 0.078       | 8004 0.021776 2.7418  |
| 1802     | 0.012       | 0.073                | 907         | 0.0168               | 0.057       | 7724 0.022231 3.1215  |
| 2812     | 9.47E-03    | 0.045                | 797         | 0.018                | 0.041       | 13726 0.016702 2.8311 |
| 3322     | 8.76E-03    | 0.069                | 1190        | 0.0148               | 0.061       | 16118 0.015381 2.4565 |
| 2995     | 9.24E-03    | 0.061                | 2057        | 0.0112               | 0.029       | 15667 0.015646 2.0747 |
| 3697     | 8.33E-03    | 0.055                | 1204        | 0.0147               | 0.051       | 19332 0.01406 1.9819  |
| 3937     | 8.09E-03    | 0.072                | 1607        | 0.0127               | 0.062       | 19641 0.013932 2.1235 |
| 3962     | 8.10E-03    | 0.063                | 1836        | 0.0118               | 0.074       | 18334 0.014396 2.1905 |
| 4263     | 7.81E-03    | 0.067                | 2085        | 0.0111               | 0.075       | 18622 0.014283 2.1836 |
| 4994     | 7.20E-03    | 0.087                | 2419        | 0.0103               | 0.089       | 21613 0.013227 2.2425 |
| 4613     | 7.51E-03    | 0.078                | 3308        | 8.81E-03             | 0.053       | 22125 0.01314 2.125   |
| 4872     | 7.31E-03    | 0.048                | 3628        | 8.42E-03             | 0.074       | 22101 0.013112 2.5326 |

| Average reproduction standard error | Average lifespan | Average Lifepan standard error |
|-------------------------------------|------------------|--------------------------------|
| 0.03795659                          | 61.1             | 0.936837055                    |
| 0.043806825                         | 63.8             | 1.057579263                    |
| 0.039685385                         | 63.6             | 0.95653498                     |
| 0.045117912                         | 61.1             | 1.087341688                    |
| 0.043084224                         | 56.2             | 1.038329787                    |
| 0.045383796                         | 52.9             | 1.09374948                     |
| 0.038791153                         | 53.5             | 0.934866791                    |
| 0.037184749                         | 46.9             | 0.896152458                    |
| 0.038399177                         | 44.4             | 0.925420176                    |
| 0.029962979                         | 46.1             | 0.722107805                    |
| 0.034036444                         | 44.9             | 0.8202783                      |
| 0.040248008                         | 44.2             | 0.969976997                    |
| 0.0298823                           | 39.3             | 0.720163424                    |
| 0.025008107                         | 39.9             | 0.602695373                    |
| 0.023499328                         | 39.8             | 0.566333815                    |
| 0.020526038                         | 44.3             | 0.494677524                    |
| 0.02138912                          | 46.8             | 0.515477788                    |
| 0.022844376                         | 49.8             | 0.550549459                    |
| 0.021846592                         | 54.2             | 0.526502865                    |
| 0.018918806                         | 61.4             | 0.455943222                    |
| 0.016424702                         | 62.6             | 0.395835311                    |
| 0.016230115                         | 63.3             | 0.391145769                    |
